# Supplementary material for: RBOH1-dependent H2O2 production and subsequent activation of MPK1/2 play an important role in acclimation-induced cross-tolerance in tomato
Source: PubMed Central journal article supplement (PMC3904713; doi:10.1093/jxb/ert404), 2013-12-09
Supplement: supp_ert404_jexbot111062_file001.pdf [file supp_ert404_jexbot111062_file001.pdf]

## SUPPLEMENTARY DATA

### Supplementary Figure S1

A

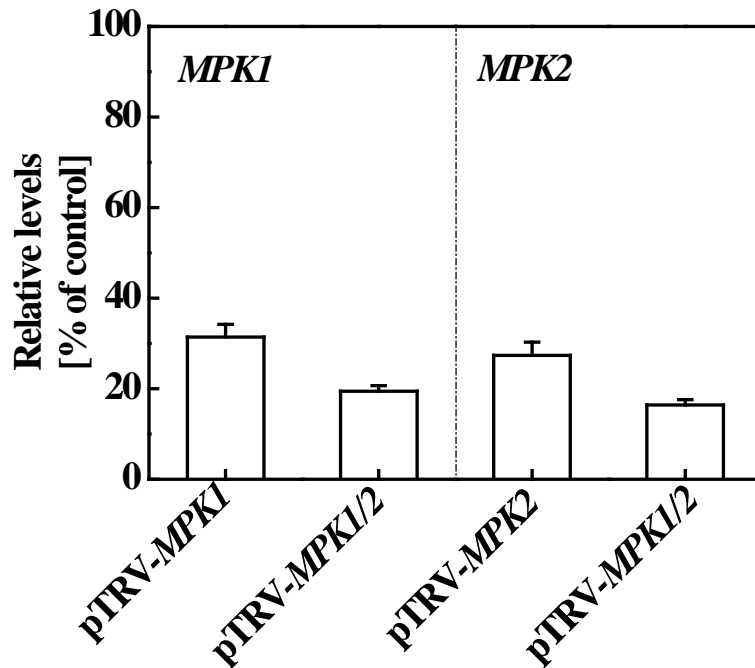

B

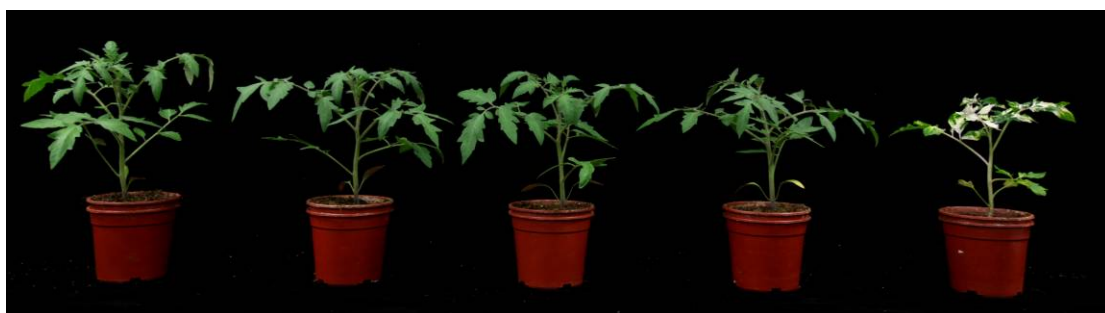

pTRV      pTRV-MPK1      pTRV-MPK2      pTRV-MPK1/2      pTRV-PDS

**Figure S1.** Relative mRNA abundance of *MPK1* and *MPK2* in VIGS plants (A) and the phenotypes of VIGS plants (B). The expression of *MPK1* and *MPK2* were analyzed at 30 d after *Agrobacterium*-infection. Data are the means of the 5<sup>th</sup> leaf of six silenced plants ( $\pm$ SD). The levels were expressed as percentages of the mean levels in control pTRV plants which were defined as 100%. The bleaching of the pTRV-*PDS* (phytoene desaturase) plants was used to monitor the progress of gene silencing.

Supplementary Figure S2.

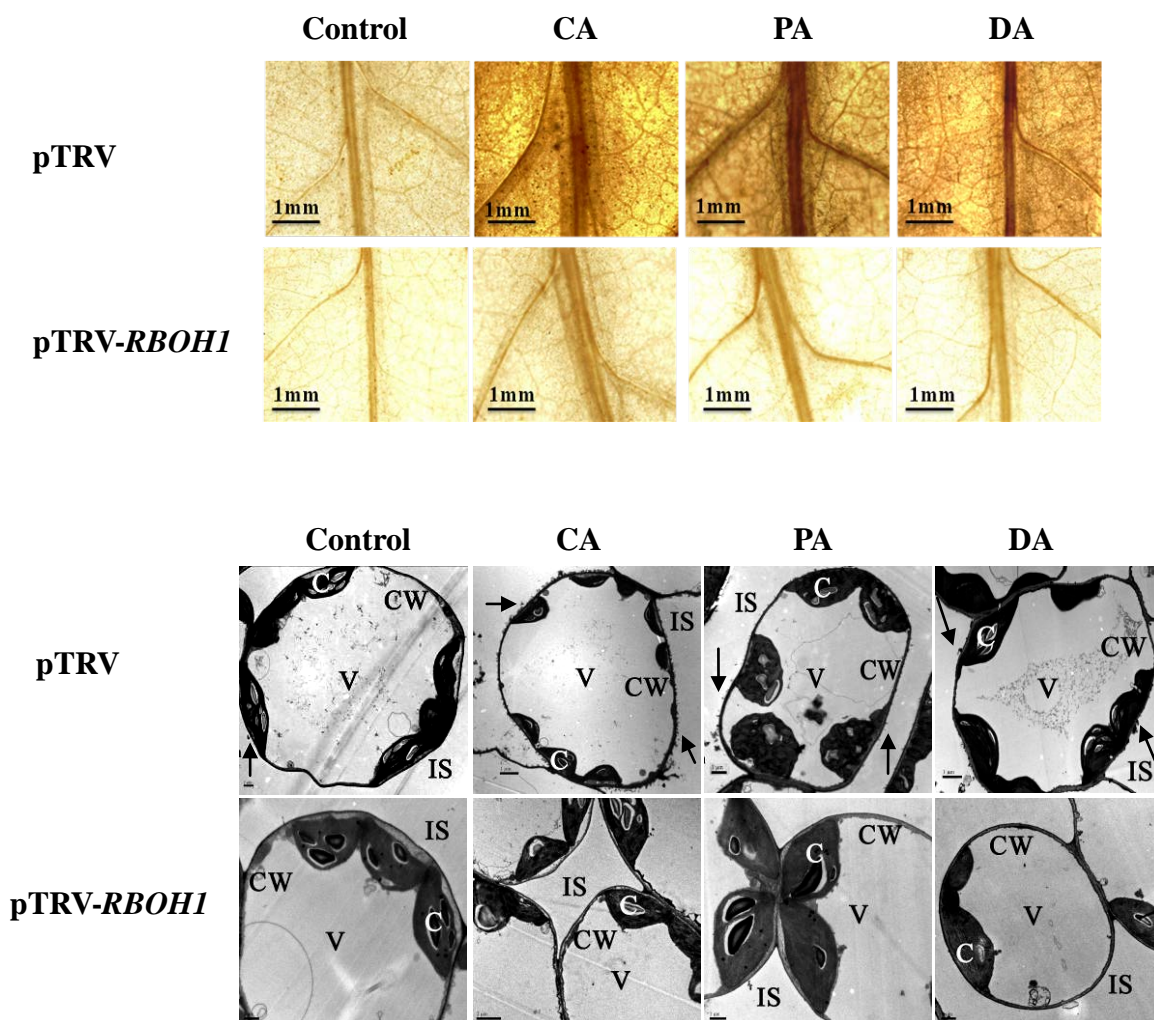

**Figure S2.** Cross-acclimation induced ROS accumulation in pTRV and pTRV-RBOH1 plants

A, The *in situ* detection of H<sub>2</sub>O<sub>2</sub> in leaves. The leaf segments were loaded with DAB and incubated for 6 h. The H<sub>2</sub>O<sub>2</sub> accumulation was detected by microscope. Bar = 1.0 mm.

B, The cytochemical localization of H<sub>2</sub>O<sub>2</sub> accumulated in the mesophyll cells of leaves detected with CeCl<sub>3</sub> staining and transmission electron microscopy. Arrows, CeCl<sub>3</sub> precipitates; C, chloroplast; CW, cell wall; V, vacuole; IS, intercellular space.

Control, non acclimation; CA, cold acclimation; PA, paraquat acclimation; DA, drought acclimation.

**Supplementary Table S1.** Primers for qRT-PCR.

| Gene             | Accession Numbers | Forward primer                   | Reverse primer                   |
|------------------|-------------------|----------------------------------|----------------------------------|
| <i>RBOH1</i>     | S108g081690       | 5'-GGAGCTCCAGCACAAAGATTA-3'      | 5'-CTTGTTGCAGCACTCATGTC-3'       |
| <i>MPK1</i>      | S112g019460       | 5'- GCTGACAGATTGTTGCAGGT -3'     | 5'- TCCACCCCATAAAGATACATCA -3'   |
| <i>MPK2</i>      | S108g014420       | 5'- TACTCGCTCGTTTGCTGTTG -3'     | 5'- TTGGAGTACAGGAAAACAATGG -3'   |
| <i>NPR1</i>      | S107g040690       | 5'- GATAGCAACACGAAGCTGGA -3'     | 5'- GGCCTACAAGCTACATGCAA -3'     |
| <i>NPR1.1</i>    | S107g044980       | 5'- TGGACATACAGCCCTATCCA -3'     | 5'- AGCCGATCTTGGAGTCTTT -3'      |
| <i>PR1</i>       | S101g106600       | 5'- CGTGCAGGCAGTTAATTTGT -3'     | 5'- CACAAACCACCATTCACCAT -3'     |
| <i>Fe-SOD</i>    | S106g048410       | 5'- TAAATAGAGACTTTGGTTCC -3'     | 5'- TATATTTGCCTCTTAACCCT -3'     |
| <i>Cu/Zn-SOD</i> | S111g066390       | 5'- GGCCAATCTTTGACCCTTTA -3'     | 5'- AGTCCAGGAGCAAGTCCAGT -3'     |
| <i>cAPX</i>      | S106g005160       | 5'- TCTGAATTGGGATTTGCTGA -3'     | 5'- CGTCTAACGTAGCTGCCAAA -3'     |
| <i>GRI</i>       | S109g091840       | 5'- TTGGTGGAACGTGTGTTCTT -3'     | 5'- TCTCATTCACCTCCCATCCA -3'     |
| <i>CAT1</i>      | S112g094620       | 5'- TGATCGCGAGAAGATACCTG -3'     | 5'-CTTCCACGTTTCATGGACAAC-3'      |
| <i>Actin</i>     | S111g005330       | 5'- TGTCCCTATTTACGAGGGTTATGC -3' | 5'- CAGTTAAATCACGACCAGCAAGAT -3' |
